# Supplementary material for: Characterisation of cardiomyopathy by cardiac and aortic magnetic resonance in patients new to hemodialysis
Source: Springer Nature journal article supplement (doi:10.1007/s00330-015-4096-2), 2015-12-17
Supplement: MOESM1 [file 8323092]

**Supplemental Table 1 CMR parameters amongst subgroups of 54 HD patients**

|                                        | DIABETES        |                 |      | Ischemic heart disease or prior LV dysfunction |                 |      | BETABLOCKER     |                 |      | RAAS anatagonist |              |      |
|----------------------------------------|-----------------|-----------------|------|------------------------------------------------|-----------------|------|-----------------|-----------------|------|------------------|--------------|------|
|                                        | yes             | no              | p    | yes                                            | no              | p    | yes             | no              | p    | yes              | no           | p    |
|                                        | n=14            | n=40            |      | n=13                                           | n=41            |      | n=19            | n=35            |      | n=14             | n=40         |      |
| Global peak systolic strain (%)        | 14.1±4          | 16.6±3.3        | 0.03 | 15.1±4                                         | 16.2±3.6        | 0.4  | 16.6±3.6        | 15.5±3.7        | 0.3  | 15.9±2.7         | 15.9±4       | 1    |
| Peak diastolic strain rate (s-1)       | 0.68[0.62,0.75] | 0.91[0.71,1.03] | 0.02 | 0.68[0.6,0.71]                                 | 0.91[0.73,1.03] | 0.01 | 0.83[0.68,1.02] | 0.87[0.63,0.98] | 0.9  | 0.82±0.26        | 0.88±0.27    | 0.5  |
| LV dyssynchrony by SD-TTP (ms)         | 67[50,72]       | 47[36,72]       | 0.04 | 61±26                                          | 54±20           | 0.3  | 53±20           | 57±22           | 0.5  | 42±38,72         | 56±39,72     | 0.2  |
| LV End-diastolic volume Index (ml/m2)* | 88[69,105]      | 88[72,101]      | 0.6  | 86±21                                          | 88±24           | 0.9  | 99±80,115       | 81±71,95        | 0.04 | 75±18            | 92±24        | 0.02 |
| LV Ejection Fraction (%)               | 46[39,55]       | 54[50,58]       | 0.01 | 50±11                                          | 51±9            | 0.9  | 53±9            | 49±10           | 0.3  | 56[50,59]        | 51[45,56]    | 0.04 |
| LV Mass Index(g/m2)*                   | 71±21           | 66±17           | 0.5  | 73[68,84]                                      | 61[52,75]       | 0.06 | 68[61,79]       | 61[52,79]       | 0.2  | 67±21            | 68±17        | 0.8  |
| Aortic distensibility (mmHg-1×10-3)    | 1.1[0.7,1.6]    | 2.1[1.5,4.1]    | 0.01 | 1.8[1.3,2]                                     | 2.1[1.3,3.6]    | 0.4  | 2.8[1.4,4.1]    | 1.7[1.1,2.5]    | 0.1  | 1.7[0.5,4.1]     | 2[1.4,2.8]   | 0.7  |
| Aortic pulse wave velocity (m/s)       | 8.3±1.9         | 7.8±4           | 0.8  | 8.9[8.5,11.6]                                  | 6.3[5,10.3]     | 0.2  | 8.2±3.5         | 7.7±3.6         | 0.8  | 7.0[2.4,11.7]    | 8.5[5.2,9.8] | 0.8  |

**Supplemental Table 2 CMR parameters in non-diabetic HD patients compared to controls.**

|                                                               | HD<br>n=40      | NC<br>n=27      | p-value |
|---------------------------------------------------------------|-----------------|-----------------|---------|
| Global peak systolic strain (%)                               | 16.6±3.3        | 19.6±3.4        | 0.001   |
| Peak diastolic strain rate (s <sup>-1</sup> )                 | 0.91[0.72,1.03] | 0.91[0.77,1.01] | 0.7     |
| LV dyssynchrony by SD-TTP (ms)                                | 52±21           | 38±14           | 0.004   |
| LV End-diastolic volume Index (ml/m <sup>2</sup> )*           | 89±24           | 75±14           | 0.004   |
| LV Ejection Fraction (%)                                      | 54[50,58]       | 60[56,63]       | <0.001  |
| LV Mass Index(g/m <sup>2</sup> )*                             | 63[55,79]       | 46[42,53]       | <0.001  |
| Aortic distensibility (mmHg <sup>-1</sup> ×10 <sup>-3</sup> ) | 2.1[1.6,3.6]    | 4.1[3.5,5.2]    | 0.01    |
| Aortic pulse wave velocity (m/s)                              | 7.4[5,10.7]     | 5.4[3.8,6.2]    | 0.2     |
